# Supplementary material
Source: publisher figshare collection journal article supplement (https://diabetesjournals.figshare.com/ndownloader/files/34115873)
Supplement: Supplementary file 1 [file 34115873]

**Supplementary Appendix S1. Diabetes Training for Community Paramedics - Program Evaluation**

Our goal is to ensure that we are providing an effective program that meets your needs and expectations. We value your opinion and need your feedback. Please take a moment to complete this curriculum evaluation. The administrator of this program will review your ratings, comments, and overall satisfaction with the curriculum. Responses will be anonymous to community paramedics and team leaders.

**Participation**

Which session(s) did you attend? Please check all that apply.

- Original 2-day diabetes training (June 2020)
- Diabetes "bootcamp" refresher (April 12, 2021)
- CP Conference diabetes medications talk (April 30, 2021)
- Other

**How would you rate your current comfort level with the following content areas?**

|  | Not at all comfortable | Somewhat uncomfortable | Neutral | Somewhat comfortable | Very comfortable | N/A or do not know |
| --- | --- | --- | --- | --- | --- | --- |
| Cultural competency |  |  |  |  |  |  |
| Chronic diabetes complications |  |  |  |  |  |  |
| Blood glucose monitoring using a glucometer |  |  |  |  |  |  |
| Blood glucose monitoring using a CGM |  |  |  |  |  |  |
| Managing and preventing hypoglycemia |  |  |  |  |  |  |
| Managing and preventing hyperglycemia |  |  |  |  |  |  |
| Insulin therapy |  |  |  |  |  |  |
| Insulin pump therapy |  |  |  |  |  |  |
| Non-insulin diabetes medications |  |  |  |  |  |  |
| Diet and nutrition considerations in diabetes |  |  |  |  |  |  |
| Psychological elements of diabetes |  |  |  |  |  |  |
| Adult learning theory and teaching adults |  |  |  |  |  |  |
| Financial barriers to care |  |  |  |  |  |  |
| Multi-disciplinary team care and working with the patient’s other healthcare providers |  |  |  |  |  |  |
| Common comorbidities in patients with diabetes |  |  |  |  |  |  |
| The experience of living with diabetes (patient perspectives) |  |  |  |  |  |  |

**How much has your knowledge in the following areas improved as a result of the training you attended?**

|  | Not at all | Somewhat | Very | N/A or do not know |
| --- | --- | --- | --- | --- |
| Cultural competency |  |  |  |  |
| Chronic diabetes complications |  |  |  |  |
| Blood glucose monitoring using a glucometer |  |  |  |  |
| Blood glucose monitoring using a CGM |  |  |  |  |
| Managing and preventing hypoglycemia |  |  |  |  |
| Managing and preventing hyperglycemia |  |  |  |  |
| Insulin therapy |  |  |  |  |
| Insulin pump therapy |  |  |  |  |
| Non-insulin diabetes medications |  |  |  |  |
| Diet and nutrition considerations in diabetes |  |  |  |  |
| Psychological elements of diabetes |  |  |  |  |
| Adult learning theory and teaching adults |  |  |  |  |
| Financial barriers to care |  |  |  |  |
| Multi-disciplinary team care and working with the patient’s other healthcare providers |  |  |  |  |
| Common comorbidities in patients with diabetes |  |  |  |  |
| The experience of living with diabetes (patient perspectives) |  |  |  |  |

**Overall Evaluation**

**Please provide feedback on the overall diabetes training and curriculum, specifically how effective are/were each of the following to helping you learn about diabetes management.**

|  | Poor | Fair | Neutral | Good | Excellent | N/A or do not know |
| --- | --- | --- | --- | --- | --- | --- |
| Initial 2-day CP course (June 2020) |  |  |  |  |  |  |
| Diabetes bootcamp (April 2021) |  |  |  |  |  |  |
| Diabetes medication talk at CP conference (April 2021) |  |  |  |  |  |  |
| Conversations with CP Medical Director about specific patient cases |  |  |  |  |  |  |
| Conversations with CP Medical Director about diabetes in general |  |  |  |  |  |  |
| Conversations with peers (other CPs) about specific patients |  |  |  |  |  |  |
| Conversations with peers (other CPs) about diabetes in general |  |  |  |  |  |  |
| Independent learning about diabetes |  |  |  |  |  |  |
| Conversations with the patients’ other healthcare providers |  |  |  |  |  |  |
| Overall program |  |  |  |  |  |  |

**General Feedback**

1. What other subject areas would you like to see covered?

2. What would be the most effective way of delivering this content?

3. What is the most effective way to support continuing education?

4. What topics have been the most useful when taking care of patients with diabetes?

5. What content was not useful and could have been eliminated from this program?

6. Other Comments:
